# Supplementary material for: The empirical basis for modelling glacial erosion rates
Source: PubMed Central journal article supplement (PMC7005307; doi:10.1038/s41467-020-14583-8), 2020-02-06
Supplement: 41467_2020_14583_MOESM1_ESM.pdf [file 41467_2020_14583_MOESM1_ESM.pdf]

1

## Supplementary Materials

2 **Supplementary Table 1:** *Glacial erosion, sliding velocity and climate data. MAAT is Mean Annual Air Temperature, and MAP is*  
 3 *Mean Annual Precipitation, both derived from ERA-Interim data.*

| Location      | Latitude | Dynamic context  | Erosion rate (mm a <sup>-1</sup> ) | Sliding velocity (m a <sup>-1</sup> ) | MAAT (°C) | MAP (mm) | Nature and source of erosion data                                                                | Nature and source of velocity data                                                                                                                                                                         |
|---------------|----------|------------------|------------------------------------|---------------------------------------|-----------|----------|--------------------------------------------------------------------------------------------------|------------------------------------------------------------------------------------------------------------------------------------------------------------------------------------------------------------|
| <i>Alaska</i> |          |                  |                                    |                                       |           |          |                                                                                                  |                                                                                                                                                                                                            |
| Bench         | 61       | Land-terminating | 1.50                               | 1.5                                   | -1.7      | 2293.0   | Meltwater gauging from 1999-2002 <sup>1</sup>                                                    | Sliding velocity from 1999-2002 glacier-wide velocity study <sup>1</sup>                                                                                                                                   |
| Crillon       | 58.6     | Tidewater        | 12.01                              | 636.9                                 | 2.5       | 3157.1   | Marine sediments from 1926-1961 <sup>2</sup>                                                     | Modelled sliding velocity from 1983-1987 surface velocity near calving terminus <sup>3</sup><br>Surface velocity: 640 m a <sup>-1</sup><br>Ice thickness: 160 m <sup>(4)</sup><br>Surface slope: 0.06 m/m  |
| Grand Pacific | 59       | Tidewater        | 24.86                              | 268.6                                 | -1.0      | 2867.3   | Marine sediments (unknown time period); Average of values from <sup>2</sup>                      | Modelled sliding velocity from 1988-1991 surface velocity near calving terminus <sup>5</sup><br>Surface velocity: 269 m a <sup>-1</sup><br>Ice thickness: 120 m <sup>(4)</sup><br>Surface slope: 0.05 m/m  |
| Hubbard       | 60       | Tidewater        | 13.71                              | 3199.5                                | -3.7      | 1990.7   | Marine sediments from last 700 years <sup>2</sup>                                                | Modelled sliding velocity from 1988-1989 surface velocity near calving terminus <sup>6</sup><br>Surface velocity: 3200 m a <sup>-1</sup><br>Ice thickness: 150 m <sup>(4)</sup><br>Surface slope: 0.04 m/m |
| Johns Hopkins | 58.8     | Tidewater        | 47.24                              | 787.1                                 | 2.2       | 3114.3   | Marine sediments (unknown time period) <sup>2</sup>                                              | Modelled sliding velocity from 1983-1987 surface velocity near calving terminus <sup>3</sup><br>Surface velocity: 800 m a <sup>-1</sup><br>Ice thickness: 200 m <sup>(4)</sup><br>Surface slope: 0.07 m/m  |
| Kennicott     | 61.5     | Land-terminating | 1.00                               | 138.0                                 | -5.8      | 909.5    | Meltwater gauging from 1999 & 2000; Average of values from <sup>7</sup>                          | Modelled sliding velocity from 2000 surface velocity of lower glacier <sup>8</sup><br>Surface velocity: 146 m a <sup>-1</sup><br>Ice thickness: 350 m <sup>(8,9)</sup><br>Surface slope: 0.03 m/m          |
| Margerie      | 59       | Tidewater        | 60.07                              | 672.7                                 | 0.3       | 2986.5   | Meltwater gauging (unknown time period; ~1994?) <sup>2</sup>                                     | Modelled sliding velocity from 1988-1991 surface velocity near calving terminus <sup>5</sup><br>Surface velocity: 679 m a <sup>-1</sup><br>Ice thickness: 200 m <sup>(4)</sup><br>Surface slope: 0.06 m/m  |
| Muir          | 59       | Tidewater        | 25.10                              | 1697.5                                | -1.8      | 2632.7   | Marine sediments representing ~2100 years in early Holocene; Average of values from <sup>2</sup> | Modelled sliding velocity from 1988-1991 surface velocity near calving terminus <sup>5</sup><br>Surface velocity: 1700 m a <sup>-1</sup><br>Ice thickness: 100 m <sup>(4)</sup><br>Surface slope: 0.10 m/m |

|                       |       |                  |       |       |      |        |                                                                                     |                                                                                                                                                                                                                   |
|-----------------------|-------|------------------|-------|-------|------|--------|-------------------------------------------------------------------------------------|-------------------------------------------------------------------------------------------------------------------------------------------------------------------------------------------------------------------|
| Variegated            | 60    | Land-terminating | 5.19  | 51.9  | -3.9 | 2631.8 | Meltwater gauging from 1982-1984 <sup>10</sup>                                      | Sliding velocity assumed from 1982-1984 surface velocity of upper glacier <sup>10</sup>                                                                                                                           |
| <b>European Alps</b>  |       |                  |       |       |      |        |                                                                                     |                                                                                                                                                                                                                   |
| Argentiere            | 46.0  | Land-terminating | 36.00 | 250.0 | 5.3  | 1300.5 | Direct measurement from subglacial experiments <sup>11</sup>                        | Unclear; assumed to be measured sliding velocity <sup>11</sup>                                                                                                                                                    |
| Bossons               | 45.9  | Land-terminating | 1.28  | 76.5  | 5.4  | 1286.0 | Meltwater gauging (unknown time period); Average of values from <sup>12</sup>       | Modelled sliding velocity from 1958 surface velocity close to ELA <sup>13</sup><br>Surface velocity: 310 m a <sup>-1</sup><br>Ice thickness: 134 m <sup>(4)</sup><br>Surface slope: 0.32 m/m                      |
| Gornegletscher        | 45.9  | Land-terminating | 1.11  | 8.4   | 5.1  | 1200.7 | Meltwater gauging from 1970-1980; Average of values from <sup>2</sup>               | Modelled sliding velocity from 2005 surface velocity of lower glacier <sup>14</sup><br>Surface velocity: 24 m a <sup>-1</sup><br>Ice thickness: 250 m <sup>(14)</sup><br>Surface slope: 0.05 m/m                  |
| Haut Glacier d'Arolla | 45.95 | Land-terminating | 2.26  | 5.3   | 5.0  | 1230.1 | Meltwater gauging from 1989-1990; Average of values from <sup>7</sup>               | Modelled sliding velocity from 1995-1996 surface velocity of lower glacier <sup>15</sup><br>Surface velocity: 10 m a <sup>-1</sup><br>Ice thickness: 103 m <sup>(15)</sup><br>Surface slope: 0.12 m/m             |
| St Sorlin             | 45.2  | Land-terminating | 2.20  | 7.2   | 6.4  | 1146.4 | Meltwater gauging (unknown time period) <sup>12</sup>                               | Modelled sliding velocity from 1958-1967 glacier-wide velocity study <sup>16</sup><br>Surface velocity: 8 m a <sup>-1</sup><br>Ice thickness: 50 m <sup>(4)</sup><br>Surface slope: 0.18 m/m                      |
| Tsanfleuron           | 46.3  | Land-terminating | 0.50  | 4.4   | 5.7  | 1331.4 | Englacial sediment samples collected from across glacier in 2007 <sup>(17)</sup>    | Sliding velocity from 2004-2006 borehole survey of lower glacier <sup>18</sup>                                                                                                                                    |
| <b>Central Asia</b>   |       |                  |       |       |      |        |                                                                                     |                                                                                                                                                                                                                   |
| Batura                | 36.5  | Land-terminating | 5.85  | 169.0 | -8.1 | 911.9  | Meltwater gauging during 1990 ablation season; Average of values from <sup>12</sup> | Modelled sliding velocity from 1974-1975 surface velocity in middle reaches of glacier <sup>19</sup><br>Surface velocity: 170 m a <sup>-1</sup><br>Ice thickness: 200 m <sup>(4)</sup><br>Surface slope: 0.03 m/m |
| Fedchenko             | 39    | Land-terminating | 4.36  | 155.4 | -8.6 | 724.9  | Meltwater gauging from 1925-1959 <sup>2</sup>                                       | Modelled sliding velocity from 1958 surface velocity in middle reaches of glacier <sup>20</sup><br>Surface velocity: 263 m a <sup>-1</sup><br>Ice thickness: 582 m <sup>(20)</sup><br>Surface slope: 0.03 m/m     |
| Gangotri              | 30.9  | Land-terminating | 1.80  | 45.4  | 1.2  | 1648.5 | Meltwater gauging from 2000-2003 <sup>(12)</sup>                                    | Modelled sliding velocity from 2007-8 surface velocity close to ELA <sup>21</sup><br>Surface velocity: 47 m a <sup>-1</sup><br>Ice thickness: 210 m <sup>(4)</sup><br>Surface slope: 0.03 m/m                     |
| Raikot                | 35.4  | Land-terminating | 5.75  | 138.9 | -2.1 | 1495.8 | Meltwater gauging (unknown time period) <sup>12</sup>                               | Modelled sliding velocity from 1954 surface velocity in middle reaches of glacier <sup>22</sup>                                                                                                                   |

|                     |      |                  |      |       |       |        |                                                                             |                                                                                                                                                                                                                    |
|---------------------|------|------------------|------|-------|-------|--------|-----------------------------------------------------------------------------|--------------------------------------------------------------------------------------------------------------------------------------------------------------------------------------------------------------------|
|                     |      |                  |      |       |       |        |                                                                             | Surface velocity: 178 m a <sup>-1</sup><br>Ice thickness: 235 m <sup>(4)</sup><br>Surface slope: 0.08 m/m                                                                                                          |
| Siachen             | 35.3 | Land-terminating | 0.25 | 43.0  | -11.8 | 452.19 | Meltwater gauging from 1986-1991 <sup>(12)</sup>                            | Modelled sliding velocity from 2008-2009 glacier-wide surface velocity study <sup>23</sup><br>Surface velocity: 44.9 m a <sup>-1</sup><br>Ice thickness: 235 m <sup>(4)</sup><br>Surface slope: 0.03 m/m           |
| <b>Greenland</b>    |      |                  |      |       |       |        |                                                                             |                                                                                                                                                                                                                    |
| Leverett            | 67   | Land-terminating | 4.80 | 150.3 | -10.6 | 332.0  | Meltwater gauging from 2009-2010 <sup>(24)</sup>                            | Modelled sliding velocity from 2010 surface velocity of lower glacier <sup>25</sup><br>Surface velocity: 155 m a <sup>-1</sup><br>Ice thickness: 405 m <sup>(24)</sup><br>Surface slope: 0.02 m/m                  |
| Mittivakat          | 65.7 | Land-terminating | 0.13 | 6.7   | -6.5  | 1416.6 | Proglacial lake sediments from 1970-1994 <sup>(12)</sup>                    | Modelled sliding velocity from 1996-2011 glacier-wide surface velocity study <sup>26</sup><br>Surface velocity: 8 m a <sup>-1</sup><br>Ice thickness: 235 m <sup>(4)</sup><br>Surface slope: 0.09 m/m              |
| <b>Norway</b>       |      |                  |      |       |       |        |                                                                             |                                                                                                                                                                                                                    |
| Bondhusbreen        | 60   | Land-terminating | 0.44 | 29.2  | 3.0   | 2004.6 | Meltwater gauging from 1968-1986 <sup>(2)</sup>                             | Sliding velocity from 1980-1982 subglacial tunnel instrumentation study <sup>27</sup>                                                                                                                              |
| Engabreen           | 66.7 | Land-terminating | 0.27 | 47.5  | 1.3   | 1507.4 | Meltwater gauging from 1968-1986; Average of values from <sup>2,12,28</sup> | Basal ice velocity from 1996-1997 subglacial tunnel instrumentation study <sup>29</sup>                                                                                                                            |
| Nigardsbreen        | 61.7 | Land-terminating | 0.13 | 81.7  | 0.9   | 1727.9 | Meltwater gauging from 1968-1986; Average of values from <sup>2,12,28</sup> | Modelled sliding velocity from 1968-1969 surface velocity of middle reaches of glacier <sup>30</sup><br>Surface velocity: 220 m a <sup>-1</sup><br>Ice thickness: 200 m <sup>(30)</sup><br>Surface slope: 0.16 m/m |
| <b>Svalbard</b>     |      |                  |      |       |       |        |                                                                             |                                                                                                                                                                                                                    |
| Broggerbreen        | 78.9 | Land-terminating | 0.27 | 1.8   | -8.7  | 479.6  | Meltwater gauging (unknown time period) <sup>2</sup>                        | Modelled sliding velocity from 1970-1988 surface velocity close to ELA <sup>31</sup><br>Surface velocity: 2 m a <sup>-1</sup><br>Ice thickness: 100 m <sup>(32)</sup><br>Surface slope: 0.04 m/m                   |
| Erikbreen           | 79.5 | Lake-terminating | 0.19 | 3.8   | -9.5  | 414.5  | Meltwater gauging 1989-1992 <sup>(2)</sup>                                  | Sliding velocity from 1990-1991 glacier-wide velocity study <sup>32</sup>                                                                                                                                          |
| Finstervwalderbreen | 77   | Land-terminating | 1.45 | 8.2   | -5.5  | 609.9  | Meltwater gauging from 1999-2000; Average of values from <sup>33</sup>      | Modelled sliding velocity from 1950-1952 surface velocity close to ELA <sup>32</sup><br>Surface velocity: 14.3 m a <sup>-1</sup><br>Ice thickness: 260 m <sup>(32)</sup><br>Surface slope: 0.04 m/m                |

|                                 |      |                  |      |       |       |        |                                                                                        |                                                                                                                                                                                                                   |
|---------------------------------|------|------------------|------|-------|-------|--------|----------------------------------------------------------------------------------------|-------------------------------------------------------------------------------------------------------------------------------------------------------------------------------------------------------------------|
| Hannabreen                      | 79.5 | Land-terminating | 0.08 | 1.9   | -7.2  | 517.6  | Meltwater gauging 1992 <sup>(2)</sup>                                                  | Sliding velocity assumed to be ~0.3 times the 1990-1991 surface velocity of lower glacier based on similar observations at Erikbreen <sup>32</sup><br>Surface velocity: 6.2 m a <sup>-1</sup>                     |
| <i>Western USA &amp; Canada</i> |      |                  |      |       |       |        |                                                                                        |                                                                                                                                                                                                                   |
| Arapaho                         | 40   | Land-terminating | 0.13 | 5.2   | 2.0   | 678.1  | Proglacial sediments (moraine, lake outlet) sampled during 1972 & 1973 <sup>(34)</sup> | Modelled sliding velocity from 1972-1973 surface velocity close to ELA <sup>34</sup><br>Surface velocity: 5.2 m a <sup>-1</sup><br>Ice thickness: 11 m <sup>(35)</sup><br>Surface slope: 0.35 m/m                 |
| Nisqually                       | 46.9 | Land-terminating | 5.00 | 144.0 | 7.1   | 1315.4 | Meltwater gauging in 1976 <sup>(36)</sup>                                              | Sliding velocity from 1968-1970 surface velocity close to ELA <sup>37</sup>                                                                                                                                       |
| Washmawupta                     | 51   | Land-terminating | 0.70 | 2.7   | -1.1  | 749.5  | Meltwater gauging in 2007 <sup>(38)</sup>                                              | Sliding velocity from 2006-2008 glacier-wide surface velocity study <sup>38,39</sup>                                                                                                                              |
| <i>Iceland</i>                  |      |                  |      |       |       |        |                                                                                        |                                                                                                                                                                                                                   |
| Breiðamerkurjökull              | 64.1 | Tidewater        | 2.41 | 15.0  | -1.4  | 1533.8 | Direct measurement; Average of values from <sup>11</sup>                               | Sliding velocity from subglacial instrumentation study <sup>11</sup>                                                                                                                                              |
| Hoffellsjökull                  | 64.4 | Land-terminating | 2.77 | 294.7 | -1.1  | 1369.4 | Meltwater gauging (unknown time period); Average of values from <sup>2</sup>           | Modelled sliding velocity from 2002-2003 surface velocity of middle reaches of glacier <sup>40</sup><br>Surface velocity: 360 m a <sup>-1</sup><br>Ice thickness: 300 m <sup>(4)</sup><br>Surface slope: 0.07 m/m |
| Jökulsa                         | 63.5 | Land-terminating | 3.00 | 80.0  | 3.2   | 1703.7 | Meltwater gauging from 1988-1990; Average of values from <sup>2,12,28</sup>            | Sliding velocity below ELA from glacier flow modelling study <sup>41</sup>                                                                                                                                        |
| <i>Arctic Canada</i>            |      |                  |      |       |       |        |                                                                                        |                                                                                                                                                                                                                   |
| Coronation                      | 67   | Tidewater        | 0.86 | 51.5  | -15.6 | 320.4  | Marine sediments representing ~2100 years in early Holocene; <sup>2</sup>              | Modelled sliding velocity from 2011-2012 glacier-wide surface velocity study <sup>42</sup><br>Surface velocity: 52.1 m a <sup>-1</sup><br>Ice thickness: 301 m <sup>(4)</sup><br>Surface slope: 0.01 m/m          |
| <i>New Zealand</i>              |      |                  |      |       |       |        |                                                                                        |                                                                                                                                                                                                                   |
| Ivory                           | 43.1 | Lake-terminating | 5.60 | 29.7  | 8.6   | 1943.5 | Proglacial lake sediments from 1976-1985 <sup>(2)</sup>                                | Modelled sliding velocity from 1986(?) surface velocity near calving terminus <sup>43</sup><br>Surface velocity: 30 m a <sup>-1</sup><br>Ice thickness: 50 m <sup>(4)</sup><br>Surface slope: 0.13 m/m            |
| <i>Antarctica</i>               |      |                  |      |       |       |        |                                                                                        |                                                                                                                                                                                                                   |

|         |      |                  |                       |                      |       |      |                                                         |                                                                                |
|---------|------|------------------|-----------------------|----------------------|-------|------|---------------------------------------------------------|--------------------------------------------------------------------------------|
| Meserve | 77.5 | Land-terminating | $2.00 \times 10^{-3}$ | $8.0 \times 10^{-3}$ | -28.7 | 53.7 | Englacial sediment sampled in 1995-1996 <sup>(44)</sup> | Sliding velocity from 1995-1996 subglacial instrumentation study <sup>45</sup> |
|---------|------|------------------|-----------------------|----------------------|-------|------|---------------------------------------------------------|--------------------------------------------------------------------------------|

4

5

6 **Supplementary Table 2:** Regression relationships of glacier sliding velocity against erosion rate for our dataset combined with averaged data  
7 from the Franz Josef Glacier<sup>46</sup> and data from Patagonian and Antarctic tidewater glaciers<sup>47</sup>.

| Dataset                                                                                                         | Number of datapoints | Exponent (I) | Correlation coefficient (r <sup>2</sup> ) | p-value |
|-----------------------------------------------------------------------------------------------------------------|----------------------|--------------|-------------------------------------------|---------|
| Our data                                                                                                        | 38                   | 0.69         | 0.67                                      | < 0.01  |
| Our data excluding Meserve Glacier outlier                                                                      | 37                   | 0.65         | 0.54                                      | < 0.01  |
| Our data including Franz Josef Glacier average <sup>8</sup>                                                     | 39                   | 0.70         | 0.67                                      | < 0.01  |
| Our data including Patagonian tidewater glaciers <sup>20</sup>                                                  | 43                   | 0.58         | 0.56                                      | < 0.01  |
| Our data including Franz Josef Glacier <sup>8</sup> and Patagonian tidewater glaciers <sup>20</sup>             | 44                   | 0.58         | 0.56                                      | < 0.01  |
| Our data including Franz Josef Glacier <sup>8</sup> , Patagonian and Antarctic tidewater glaciers <sup>20</sup> | 52                   | 0.28         | 0.10                                      | 0.02    |

8

- 9 1 Riihimaki, C. A., MacGregor, K. R., Anderson, R. S., Anderson, S. P. & Loso, M. G. Sediment evacuation and glacial erosion rates at a  
10 small alpine glacier. *J. Geophys. Res.: Earth Surf.* **110** (2005).
- 11 2 Hallet, B., Hunter, L. & Bogen, J. Rates of erosion and sediment evacuation by glaciers: A review of field data and their implications.  
12 *Glob. Plan. Change* **12**, 213-235 (1996).
- 13 3 Pelto, M. S. & Warren, C. R. Relationship between tidewater glacier calving velocity and water depth at the calving front. *Ann. Glac.* **15**,  
14 115-118 (1991).
- 15 4 Farinotti, D. et al. A consensus estimate for the ice thickness distribution of all glaciers on Earth. *Nat. Geosci.* **12**, 168–173 (2019).
- 16 5 Hunter, L. E., Powell, R. D. & Lawson, D. E. Flux of debris transported by ice at three Alaskan tidewater glaciers. *J. Glac.* **42**, 123-135  
17 (1996).
- 18 6 Stearns, L. A., Hamilton, G. S., van der Veen, C. J., Finnegan, D. C., O'Neel, S., Scheick, J. B., and Lawson, D. E. Glaciological and  
19 marine geological controls on terminus dynamics of Hubbard Glacier, southeast Alaska. *J. Geophys. Res.: Earth Surf.* **120**, 1065– 1081  
20 (2015).
- 21 7 Anderson, S. P. Glaciers show direct linkage between erosion rate and chemical weathering fluxes. *Geomorphology* **67**, 147-157 (2005).
- 22 8 Anderson, R. S., Walder, J.S., Anderson, S.P., Trabant, D.C. and Fountain, A.G. The dynamic response of Kennicott Glacier, Alaska,  
23 USA, to the Hidden Creek Lake outburst flood. *Ann. Glac.* **40**, 237-242 (2005).
- 24 9 Anderson, S. P., Walder, J.S., Anderson, R.S., Kraal, E.R., Cunico, M., Fountain, A.G. and Trabant, D.C. Integrated hydrologic and  
25 hydrochemical observations of Hidden Creek Lake jökulhlaups, Kennicott glacier, Alaska. *J. Geophys. Res.* **108** (2003).
- 26 10 Humphrey, N. F. & Raymond, C. F. Hydrology, erosion and sediment production in a surging glacier: Variegated Glacier, Alaska, 1982–  
27 83. *J. Glac.* **40**, 539-552 (1994).

- 28 11 Boulton, G. S. Processes and patterns of glacial erosion. In *Glacial Geomorphology*. (ed. D.R. Coates) 41-87 (Springer Netherlands),  
29 (1984)
- 30 12 Delmas, M., Calvet, M. & Gunnell, Y. Variability of Quaternary glacial erosion rates – A global perspective with special reference to the  
31 Eastern Pyrenees. *Quat. Sci. Rev.* **28**, 484-498 (2009).
- 32 13 Finsterwalder, R. Chamonix Glaciers. *J. Glac.* **3**, 547-548 (1959).
- 33 14 Sugiyama, S., Bauder, A., Riesen, P. & Funk, M. Surface ice motion deviating toward the margins during speed-up events at  
34 Gornergletscher, Switzerland. *J. Geophys. Res.: Earth Surf.*, **115** (2010).
- 35 15 Willis, I., Mair, D., Hubbard, B., Nienow, P., Fischer, U.H. and Hubbard, A. Seasonal variations in ice deformation and basal motion  
36 across the tongue of Haut Glacier d’Arolla, Switzerland. *Ann. Glac.* **36**, 157-167 (2003).
- 37 16 Vincent, C., Vallon, M., Reynaud, L. & Le Meur, E. Dynamic behaviour analysis of glacier de Saint Sorlin, France, from 40 years of  
38 observations, 1957–97. *J. Glac.* **46**, 499-506 (2000).
- 39 17 Roberson, S. *Characterization and quantification of glacial sediment transport in two small valley glaciers*, PhD Thesis, Aberystwyth  
40 University (2010).
- 41 18 Chandler, D., Hubbard, B., Hubbard, A., Murray, T. & Rippin, D. Optimising ice flow law parameters using borehole deformation  
42 measurements and numerical modelling. *Geophys. Res. Lett.* **35**, (2008).
- 43 19 Shroder, J.F.Jr., Saqib Khan R. J., M. & Spenser, M. Batura Glacier Terminus, 1984, Karakorum Himalaya. *Geol. Bull.(University of*  
44 *Peshawar)* **17**, 119-126 (1984).
- 45 20 Lambrecht, A., Mayer, C., Aizen, V., Floricioiu, D. & Surazakov, A. The evolution of Fedchenko glacier in the Pamir, Tajikistan, during  
46 the past eight decades. *J. Glac.* **60**, 233-244 (2014).
- 47 21 Satyabala, S. P. Spatiotemporal variations in surface velocity of the Gangotri glacier, Garhwal Himalaya, India: Study using synthetic  
48 aperture radar data. *Rem. Sens. Env.* **181**, 151-161 (2016).
- 49 22 Shroder, J. F., Bishop, M. P., Copland, L. & Sloan, V. F. Debris-covered Glaciers and Rock Glaciers in the Nanga Parbat Himalaya,  
50 Pakistan. *Geog. Ann.: Series A, Phys. Geog.* **82**, 17-31 (2000).
- 51 23 Agarwal, V. *et al.* Area and mass changes of Siachen Glacier (East Karakoram). *J. Glac.* **63**, 148-163, doi:10.1017/jog.2016.127 (2017).
- 52 24 Cowton, T., Nienow, P., Bartholomew, I., Sole, A., Mair, D. Rapid erosion beneath the Greenland ice sheet. *Geology* **40**, 343-346 (2012).
- 53 25 Cowton, T., Nienow, P., Sole, A., Wadham, J., Lis, G., Bartholomew, I., Mair, D., and Chandler, D. Evolution of drainage system  
54 morphology at a land-terminating Greenlandic outlet glacier. *J. Geophys. Res.: Earth Surf.*, **118**, 29-41 (2013).
- 55 26 Mernild, S. H. *et al.* Volume and velocity changes at Mittivakkat Gletscher, southeast Greenland. *J. Glac.*, **59**, 660-670 (2013).
- 56 27 Hagen, J. O., Wold, B., Liestøl, O., Østrem, G. & Sollid, J. L. Subglacial Processes at Bondhusbreen, Norway: Preliminary Results. *Ann.*  
57 *Glac.* **4**, 91-98 (1983).
- 58 28 Bogen, J. Erosion rates and sediment yields of glaciers. *Ann. Glac.* **22**, 48-52 (1996).
- 59 29 Cohen, D., Hooke, R. L., Iverson, N. R. & Kohler, J. Sliding of ice past an obstacle at Engabreen, Norway. *J. Glac.* **46**, 599-610 (2000).
- 60 30 Østrem, G., Liestøl, O. & Wold, B. Glaciological investigations at Nigardsbreen, Norway. *Norsk Geog. Tids.* **30**, 187-209 (1976).
- 61 31 Hagen, J. O., Liestøl, O., Roland, E. & Jørgensen, T. Glacier atlas of Svalbard and Jan Mayen. (1993).
- 62 32 Etzelmuller, B., Vatne, G., Ødegård, R. S. & Sollid, J. L. Dynamics of Two Subpolar Valley Glaciers. Erikbreen and Hannabreen,  
63 Liefdefjorden, Northern Spitsbergen. *Geog. Ann.: Series A, Phys. Geog.*, **75**, 41-54 (1993).

64 33 Hodgkins, R., Cooper, R., Wadham, J. & Tranter, M. Suspended sediment fluxes in a high-Arctic glacierised catchment: implications for  
65 fluvial sediment storage. *Sed. Geol.* **162**, 105-117 (2003).

66 34 Reheis, M. J. Source, Transportation and Deposition of Debris on Arapaho Glacier, Front Range, Colorado, U.S.A. *J. Glac.* **14**, 407-420  
67 (1975).

68 35 Haugen, B. D., Scambos, T.A., Pfeffer, W.T. and Anderson, R.S. Twentieth-century changes in the thickness and extent of Arapaho  
69 Glacier, Front Range, Colorado. *Arct. Ant. Alp. Res.* **42**, 198-209 (2010).

70 36 Mills, H. H. Some implications of sediment studies for glacial erosion on Mount Rainier, Washington. *Northwest Sci.* **53**, 190-199 (1979).

71 37 Hodge, S. M. Variations in the sliding of a temperate glacier. *J. Glac.* **13**, 349-369 (1974).

72 38 Sanders, J.W., Cuffey, K.M., MacGregor, K.R. & Collins, B.D. The sediment budget of an alpine cirque. *GSA Bull.* **125**, 229-248, (2013).

73 39 Sanders, J.W., Cuffey, K.M., MacGregor, K.R., Kavanaugh, J.L. and Dow, C.F. Dynamics of an alpine cirque glacier. *Am. J. Sci.* **310**,  
74 753-773 (2010).

75 40 Aðalgeirsdóttir, G. *et al.* Modelling the 20th and 21st century evolution of Hoffellsjökull glacier, SE-Vatnajökull, Iceland. *Cryosphere* **5**,  
76 961-975 (2011).

77 41 Mackintosh, A., 2000. Glacier fluctuations and climatic change in Iceland. Unpublished PhD Thesis, University of Edinburgh.

78 42 Van Wychen, W. *et al.* Glacier velocities and dynamic ice discharge from the Queen Elizabeth Islands, Nunavut, Canada. *Geophys. Res.*  
79 *Let.* **41**, 484-490 (2014).

80 43 Hicks, D. M., McSaveney, M. J. & Chinn, T. J. H. Sedimentation in Proglacial Ivory Lake, Southern Alps, New Zealand. *Arct. Alp. Res.*  
81 **22**, 26-42 (1990).

82 44 Cuffey, K. M. *et al.* Entrainment at cold glacier beds. *Geology* **28**, 351-354 (2000).

83 45 Cuffey, K.M., Conway, H., Hallet, B., Gades, A.M. and Raymond, C.F. Interfacial water in polar glaciers and glacier sliding at- 17  
84 *C. Geophys. Res. Lett.*, **26**, 751-754 (1999).

85 46 Herman, F. *et al.* Erosion by an Alpine glacier. *Science* **350**, 193 (2015).

86 47 Koppes, M. *et al.* Observed latitudinal variations in erosion as a function of glacier dynamics. *Nature* **526**, 100 (2015).
